# Supplementary material
Source: Royal Society of Chemistry journal article supplement (doi:10.1039/d6dt00337k)
Supplement: d6dt00337k1.pdf [file d6dt00337k1.pdf]

## Supplementary Information

### Tuning the crystal structure, optical band gap and persistent luminescence performance of Cr<sup>3+</sup>-doped LiGa<sub>5</sub>O<sub>8</sub> spinel by adding aluminum and indium

Anastasiia Karabut<sup>a</sup>, Halyna Zhydachevska<sup>a</sup>, Łukasz Wachnicki<sup>a</sup>, Vasyl Hreb<sup>b</sup>, Leonid Vasylechko<sup>b,\*</sup>, Yuriy Hizhnyi<sup>c,d</sup>, Tetiana Shevtsova<sup>c</sup>, Andriy Luchechko<sup>e</sup>, Agnieszka Pieniążek<sup>a</sup>, Marek Berkowski<sup>a</sup>, Yaroslav Zhydachevskyy<sup>a,\*</sup>

<sup>a</sup> Institute of Physics, Polish Academy of Sciences, aleja Lotników 32/46, Warsaw 02-668, Poland

<sup>b</sup> Lviv Polytechnic National University, S. Bandera Str. 12, Lviv 79013, Ukraine

<sup>c</sup> Donetsk Institute for Physics and Engineering of NAS of Ukraine, Kyiv 03028, Ukraine

<sup>d</sup> Taras Shevchenko National University of Kyiv, Volodymyrska Str. 64/13 Kyiv 01601, Ukraine

<sup>e</sup> Ivan Franko National University of Lviv, Tarnavskogo Str. 107, Lviv 79017, Ukraine

Corresponding author: Email: [zhydach@ifpan.edu.pl](mailto:zhydach@ifpan.edu.pl), [leonid.o.vasylechko@lpnu.ua](mailto:leonid.o.vasylechko@lpnu.ua)

#### This files includes:

**Fig. S1.** Graphical results of Rietveld refinement of the selected LiGa<sub>5</sub>O<sub>8</sub>-based spinel structures. Experimental XRD patterns (blue circles) are shown along with calculated profiles (red lines) and difference curves between them. Short vertical bars indicate the positions of Bragg's maxima in the cubic P4<sub>3</sub>2 spinel structure.

**Fig. S2.** Graphical results of Rietveld refinement of chromium doped LaGa<sub>5</sub>O<sub>8</sub>-based materials annealed in vacuum.

**Fig. S3.** Concentration evolution of the lattice parameters and the nearest cation-oxygen distances in the Li(Ga<sub>1-x</sub>M<sub>x</sub>)<sub>5</sub>O<sub>8</sub> series.

**Fig. S4.** The 2×2×2 super-cell of LiGa<sub>5</sub>O<sub>8</sub> crystal.

**Table S1.** Numbers of cationic substitutions modeled in 2x2x2 super-cells of Li(Ga<sub>1-x-y</sub>Al<sub>x</sub>In<sub>y</sub>)<sub>5</sub>O<sub>8</sub>.

**Table S2.** DFT-optimized lattice parameters of Li(Ga<sub>1-x-y</sub>Al<sub>x</sub>In<sub>y</sub>)<sub>5</sub>O<sub>8</sub> alloys.

**Fig. S5.** Calculated low-energy parts of absorption spectra of Li(Ga<sub>1-x-y</sub>Al<sub>x</sub>In<sub>y</sub>)<sub>5</sub>O<sub>8</sub> crystals.

**Fig. S6.** A comparison of the TSL curves of the studied samples (as-synthesized and annealed in a vacuum) registered at 718 nm after UV (270-310 nm) exposure at a liquid nitrogen temperature. Heating rate 1 C/s.

**Fig. S7.** The PLE spectra of the studied samples measured using synchrotron irradiation at room temperature (registered at 718 nm), and their deconvolution by Gaussian peaks.

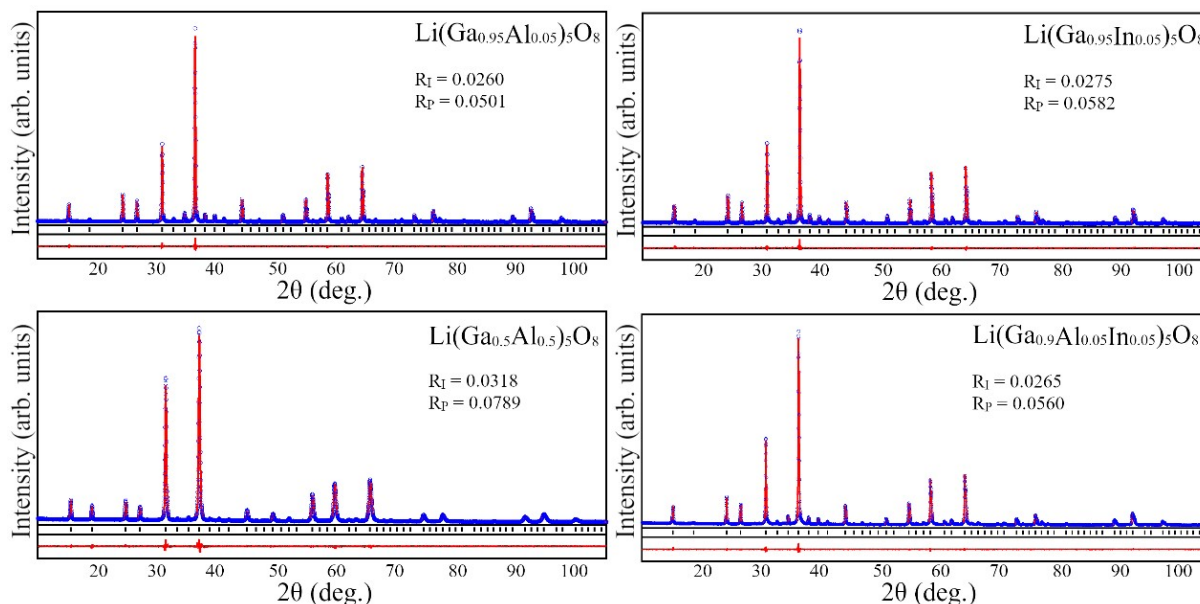

**Fig. S1.** Graphical results of Rietveld refinement of the selected LiGa<sub>5</sub>O<sub>8</sub>-based spinel structures. Experimental XRD patterns (blue circles) are shown along with calculated profiles (red lines) and difference curves between them. Short vertical bars indicate the positions of Bragg's maxima in the cubic P<sub>4</sub><sub>3</sub><sub>2</sub> spinel structure.

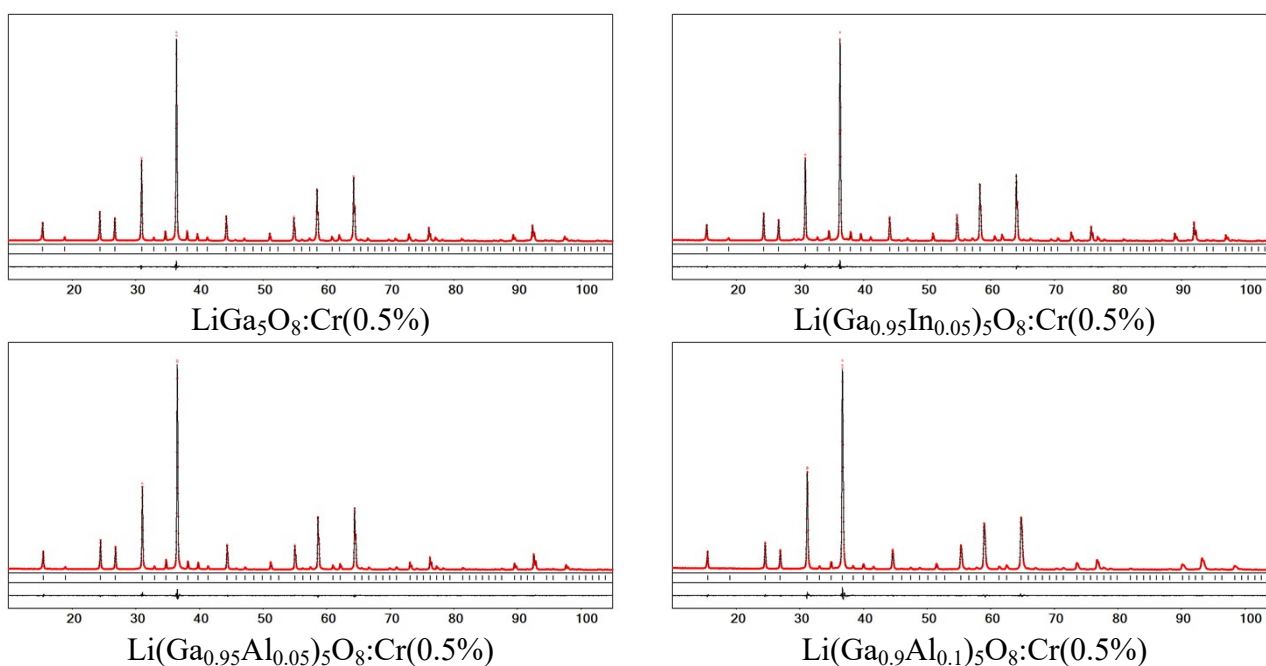

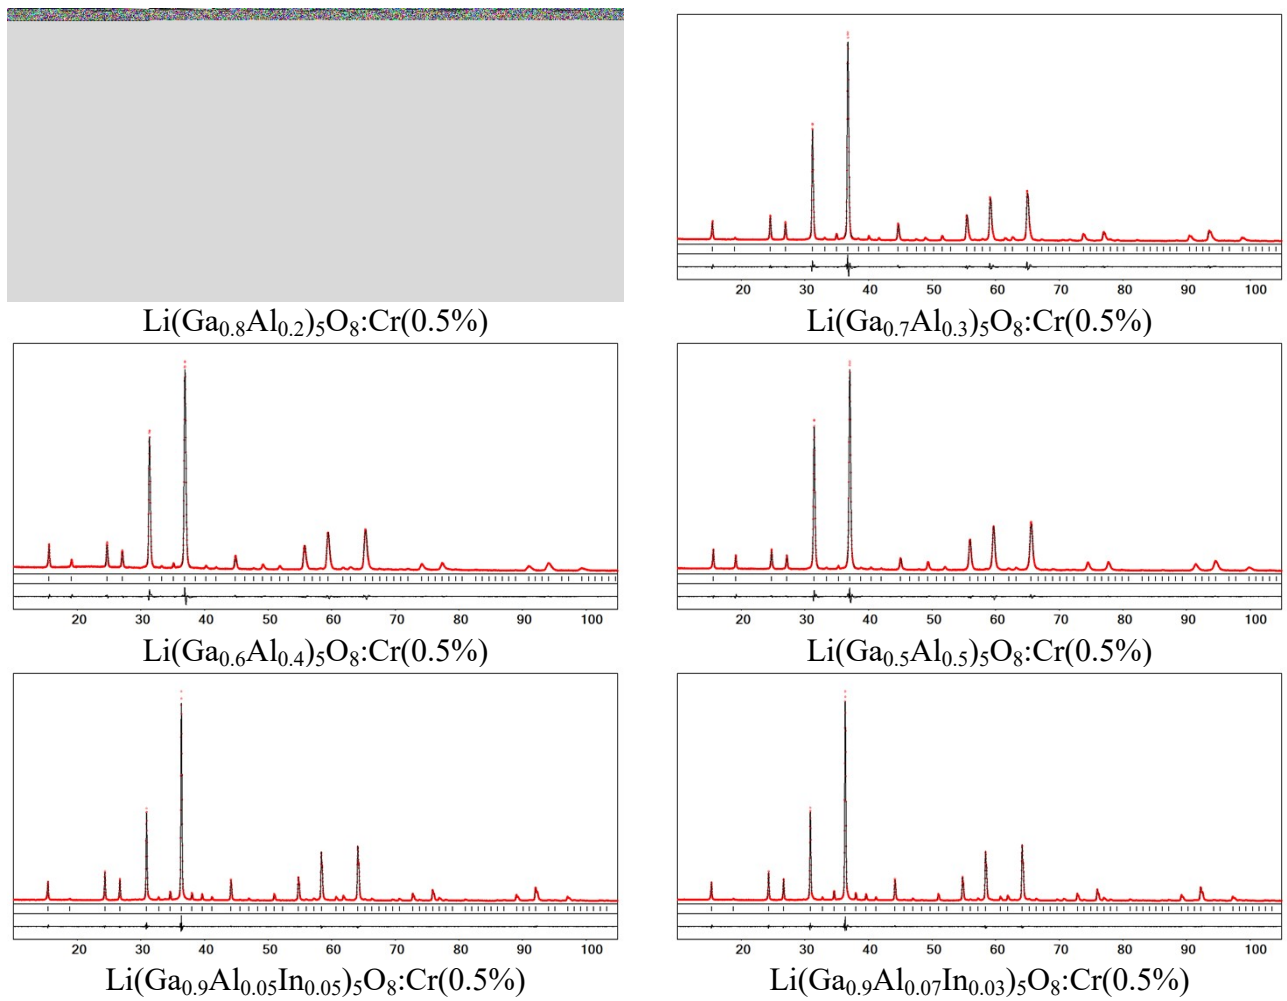

**Fig. S2.** Graphical results of Rietveld refinement of chromium doped  $\text{LaGa}_5\text{O}_8$ -based materials annealed in vacuum. Experimental (red dots) and calculated (black lines) XRD profiles and its difference curves (in the bottom of each panel) are shown for the corresponding materials.

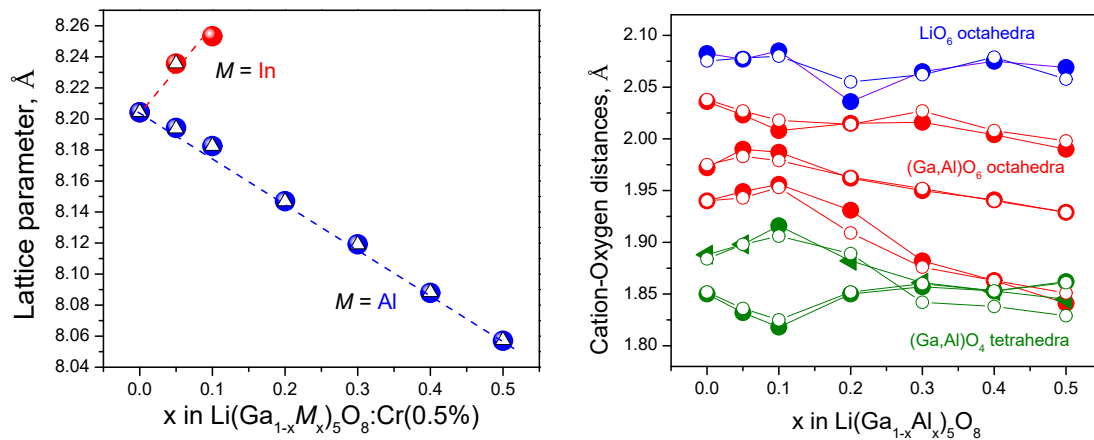

**Fig. S3.** Concentration evolution of the lattice parameters (left) and the nearest cation-oxygen distances (left) in the  $\text{Li}(\text{Ga}_{1-x}\text{M}_x)_5\text{O}_8$  series. Solid and open symbols corresponds to the as-obtained in air samples and further vacuum annealed specimens, respectively.

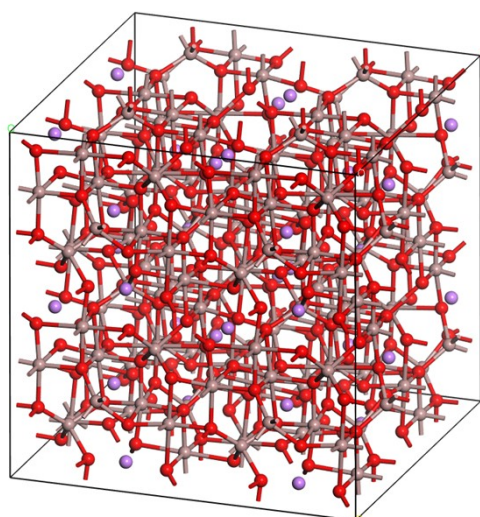

**Fig. S4.** The 2×2×2 super-cell of LiGa<sub>5</sub>O<sub>8</sub> crystal.

**Table S1.** Numbers of cationic substitutions modeled in 2x2x2 super-cells of Li(Ga<sub>1-x-y</sub>Al<sub>x</sub>In<sub>y</sub>)<sub>5</sub>O<sub>8</sub>.

| Chemical formula                                                                         | Number of cations (Composition, %) |           |          |
|------------------------------------------------------------------------------------------|------------------------------------|-----------|----------|
|                                                                                          | Ga                                 | Al        | In       |
| LiGa <sub>5</sub> O <sub>8</sub>                                                         | 160                                | 0         | 0        |
| Li(Ga <sub>0.95</sub> Al <sub>0.05</sub> ) <sub>5</sub> O <sub>8</sub>                   | 152                                | 8 (5)     | 0        |
| Li(Ga <sub>0.9</sub> Al <sub>0.1</sub> ) <sub>5</sub> O <sub>8</sub>                     | 144                                | 16 (10)   | 0        |
| Li(Ga <sub>0.8</sub> Al <sub>0.2</sub> ) <sub>5</sub> O <sub>8</sub>                     | 128                                | 32 (20)   | 0        |
| Li(Ga <sub>0.7</sub> Al <sub>0.3</sub> ) <sub>5</sub> O <sub>8</sub>                     | 112                                | 48 (30)   | 0        |
| Li(Ga <sub>0.6</sub> Al <sub>0.4</sub> ) <sub>5</sub> O <sub>8</sub>                     | 96                                 | 64 (40)   | 0        |
| Li(Ga <sub>0.5</sub> Al <sub>0.5</sub> ) <sub>5</sub> O <sub>8</sub>                     | 80                                 | 80 (50)   | 0        |
| Li(Ga <sub>0.95</sub> In <sub>0.05</sub> ) <sub>5</sub> O <sub>8</sub>                   | 160                                | 0         | 8 (5)    |
| Li(Ga <sub>0.9</sub> In <sub>0.1</sub> ) <sub>5</sub> O <sub>8</sub>                     | 152                                | 0         | 16 (10)  |
| Li(Ga <sub>0.9</sub> Al <sub>0.05</sub> In <sub>0.05</sub> ) <sub>5</sub> O <sub>8</sub> | 144                                | 8 (5)     | 8 (5)    |
| Li(Ga <sub>0.9</sub> Al <sub>0.07</sub> In <sub>0.03</sub> ) <sub>5</sub> O <sub>8</sub> | 144                                | 11 (6.8)  | 5 (3.1)  |
| Li(Ga <sub>0.8</sub> Al <sub>0.14</sub> In <sub>0.06</sub> ) <sub>5</sub> O <sub>8</sub> | 128                                | 22 (13.8) | 10 (6.3) |

**Table S2.** DFT-optimized lattice parameters of  $\text{Li}(\text{Ga}_{1-x-y}\text{Al}_x\text{In}_y)_5\text{O}_8$  alloys.

| Al-doped                 |            |            |                                   |                                   |                                   |            |            |
|--------------------------|------------|------------|-----------------------------------|-----------------------------------|-----------------------------------|------------|------------|
| Lattice parameter        | $x$        |            |                                   |                                   |                                   |            |            |
|                          | 0          | 0.05       | 0.1                               | 0.2                               | 0.3                               | 0.4        | 0.5        |
| $a, \text{\AA}$          | 8.345      | 8.3261     | 8.30639                           | 8.26942                           | 8.23394                           | 8.20348    | 8.16631    |
| $V, \text{\AA}^3$        | 1162.28413 | 1154.39854 | 1146.21563                        | 1130.97998                        | 1116.48437                        | 1104.13869 | 1089.19971 |
| In-doped, Al, In-codoped |            |            |                                   |                                   |                                   |            |            |
| Lattice parameter        | $y$        |            |                                   | $x, y$                            |                                   |            |            |
|                          | 0.05       | 0.1        | 0.3 ( $x = 0.07,$<br>$y = 0.03$ ) | 0.5 ( $x = 0.05,$<br>$y = 0.05$ ) | 0.6 ( $x = 0.14,$<br>$y = 0.06$ ) |            |            |
| $a, \text{\AA}$          | 8.38544    | 8.42772    | 8.3448                            | 8.36732                           | 8.3458                            |            |            |
| $V, \text{\AA}^3$        | 1179.25275 | 1197.18316 | 1162.19343                        | 1171.62657                        | 1162.6075                         |            |            |

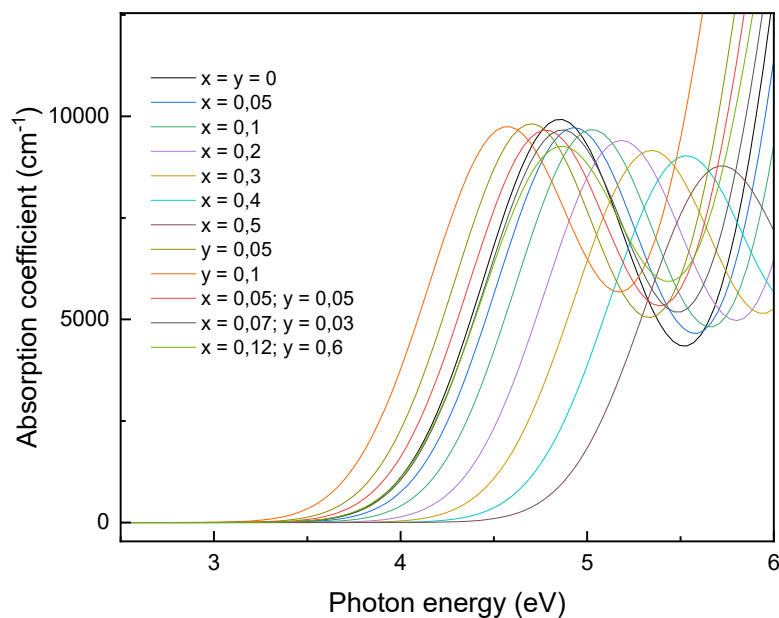**Fig. S5.** Calculated low-energy parts of absorption spectra of  $\text{Li}(\text{Ga}_{1-x-y}\text{Al}_x\text{In}_y)_5\text{O}_8$  crystals.

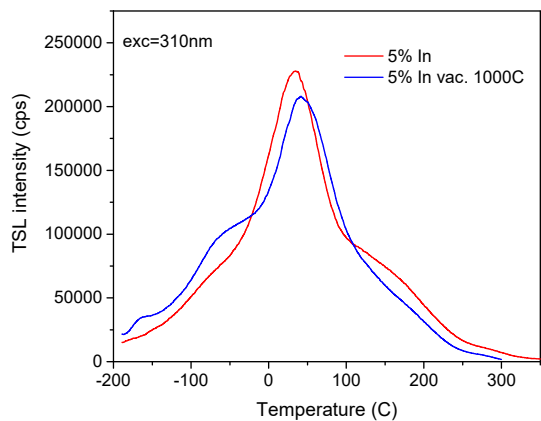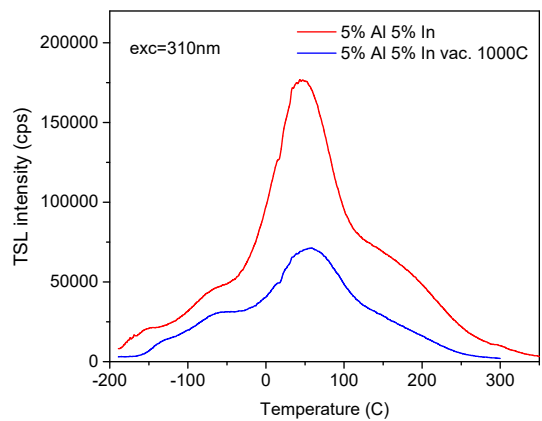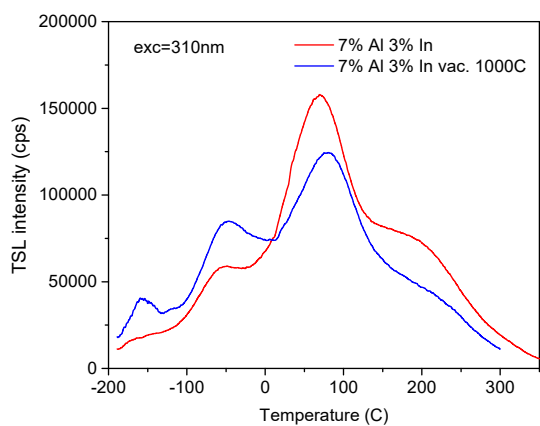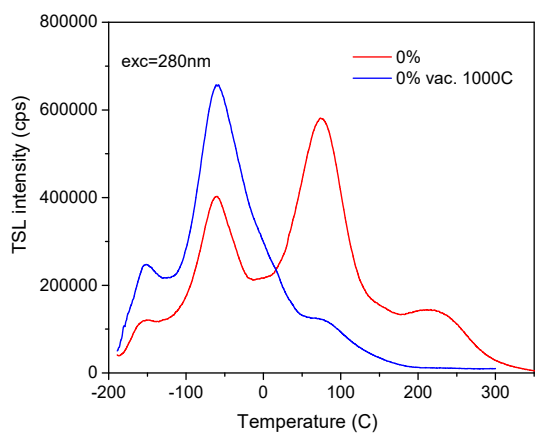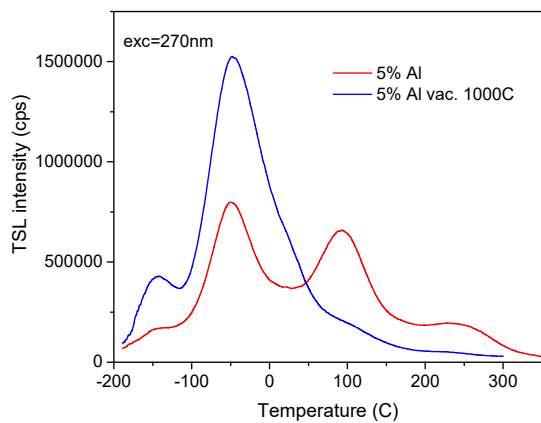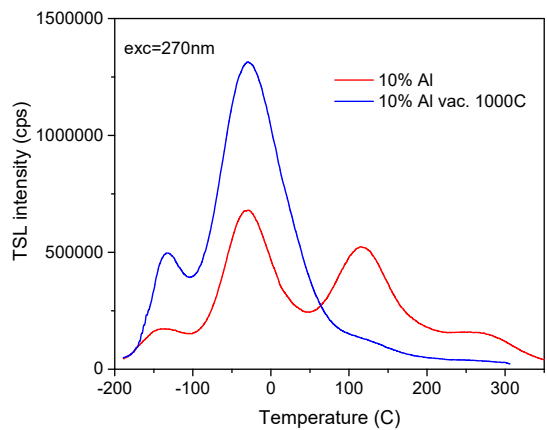

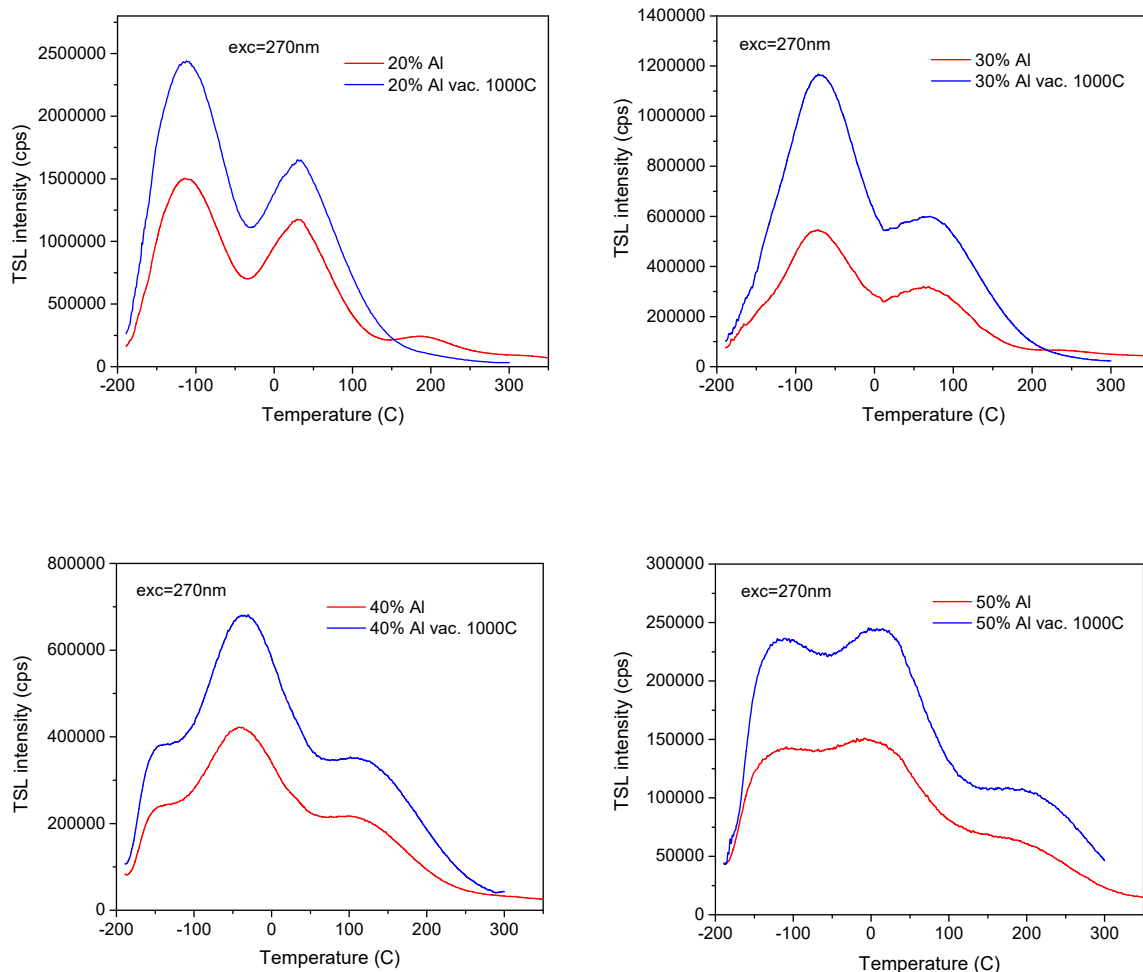

**Fig. S6.** A comparison of the TSL curves of the studied samples (as-synthesized and annealed in a vacuum) registered at 718 nm after UV (270-310 nm) exposure at a liquid nitrogen temperature. Heating rate 1 C/s.

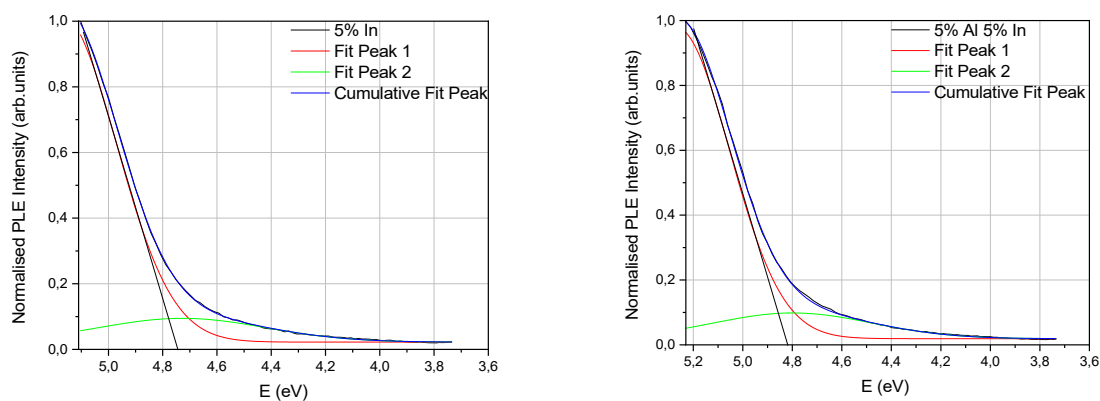

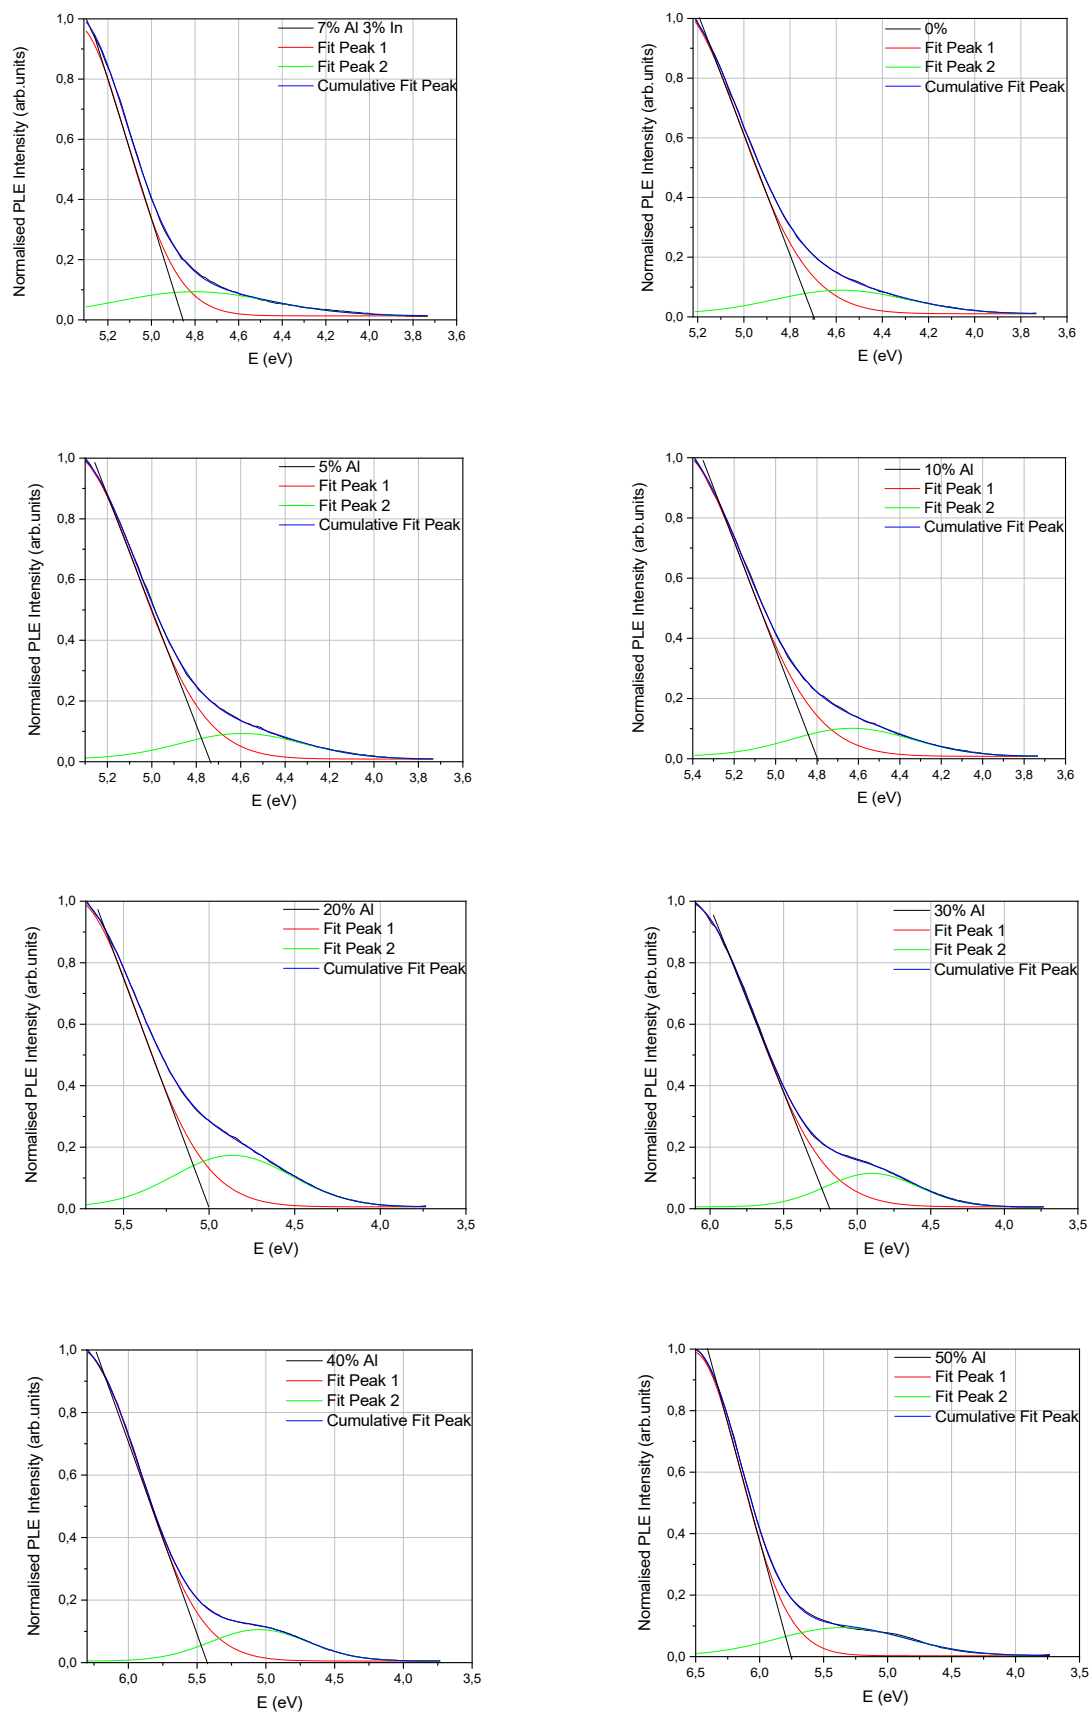

**Fig. S7.** The PLE spectra of the studied samples measured using synchrotron irradiation at room temperature (registered at 718 nm), and their deconvolution by Gaussian peaks.
